# Supplementary material for: Unexpected gas sensing properties of SiO2/SnO2 core–shell nanofibers under dry and humid conditions
Source: Royal Society of Chemistry journal article supplement (doi:10.1039/c7tc01642e), 2017-01-01
Supplement: c7tc01642e1.pdf [file c7tc01642e1.pdf]

Electronic Supplementary Materials

**Unexpected gas sensing property of SiO<sub>2</sub>/SnO<sub>2</sub> core-shell nanofibers in  
dry and humid conditions**

*Shunsuke Gunji,<sup>a</sup> Masaya Jukei,<sup>a</sup> Yasuhiko Shimotsuma,<sup>a</sup> Kiyotaka Miura,<sup>a</sup> Koichi*

*Suematsu,<sup>b</sup> Ken Watanabe,<sup>b</sup> and Kengo Shimano<sup>b</sup>*

<sup>1</sup> *Department of Material Chemistry, Graduate School of Engineering, Kyoto University,  
Kyoto 615-8510, Japan*

<sup>2</sup> *Department of Material Sciences, Faculty of Engineering Science, Kyushu University,  
Kasuga, Fukuoka 816-8580, Japan*

*Yasuhiko Shimotsuma (corresponding author)*

*E-mail : yshimo@func.mc.kyoto-u.ac.jp*

*Telephone : +81-75-383-2459*

*Facsimile : +81-75-383-2461*

### Supplemental Data 1

FT-IR spectra were measured by an FT-IR spectrometer equipped with an ATR accessory (Spectrum Two, Perkin Elmer) (Fig. S1). There is the broad peak between 700 and 400  $\text{cm}^{-1}$  derived from typical  $\text{SnO}_2$  absorption<sup>1</sup> each in the  $\text{SiO}_2/\text{SnO}_2$  nanofibers and the  $\text{SnO}_2$  nanoparticles, besides the peaks derived from amorphous  $\text{SiO}_2$ <sup>2</sup> and Si–O–Sn bond<sup>3</sup> in the  $\text{SiO}_2/\text{SnO}_2$  nanofibers.

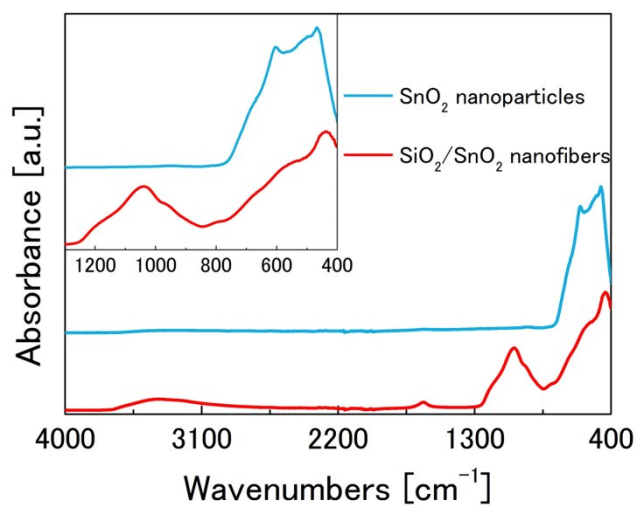

**Fig. S1** FT-IR spectra of  $\text{SiO}_2/\text{SnO}_2$  nanofibers and  $\text{SnO}_2$  nanoparticles.

## Supplemental Data 2

X-ray photoelectron spectroscopy (XPS) measurements were performed on an XPS microprobe spectrometer (PHI 5000 Versa Probe II, Ulvac-Phi). All XPS spectra were calibrated using a C 1s peak which is assumed at 284.8 eV<sup>4</sup>. As a reference material, commercial SnO<sub>2</sub> nanoparticles with rutile phase (Sigma-Aldrich) were also measured. In the XPS spectra of the SiO<sub>2</sub>/SnO<sub>2</sub> nanofibers, the chemical shifts in binding energy of Sn 3d were observed depending on the presence of SiO<sub>2</sub>. It is speculated that these shifts were derived from the Si–O–Sn bond as reported in the system of SnO<sub>2</sub> thin film deposited on SiO<sub>2</sub> substrate<sup>5</sup>.

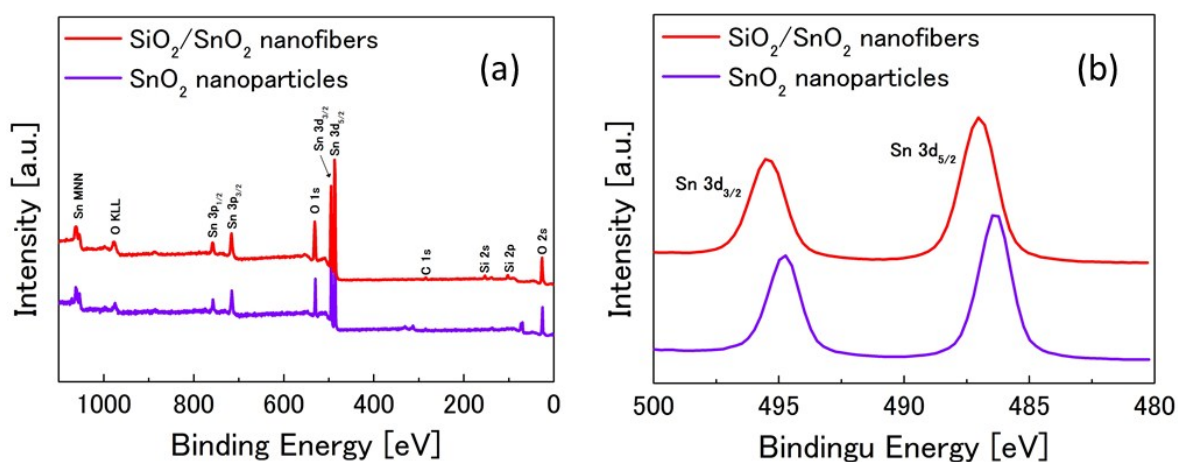

**Fig. S2** XPS patterns of SiO<sub>2</sub>/SnO<sub>2</sub> nanofibers and SnO<sub>2</sub> nanoparticles; (a) Survey spectra and (b) high resolution spectra for Sn 3d.

### Supplemental Data 3

Zeta potential measurements were carried out with a zeta potential analyzer (ELSZ-2Plus, Otsuka Electronics). As reference materials, commercial SnO<sub>2</sub> nanoparticles with rutile phase (Sigma-Aldrich) and commercial amorphous SiO<sub>2</sub> nanoparticles (Sigma-Aldrich) were also measured. Although the SnO<sub>2</sub> nanoparticles showed the isoelectric between 4 and 5, the SiO<sub>2</sub>/SnO<sub>2</sub> nanofibers showed the behavior as same as the SiO<sub>2</sub> nanoparticles. Hence, it seemed that SiO<sub>2</sub> in the SiO<sub>2</sub>/SnO<sub>2</sub> nanofibers partially exposed at the surface in analogy with the SiO<sub>2</sub>/TiO<sub>2</sub> nanofibers previously reported <sup>6</sup>.

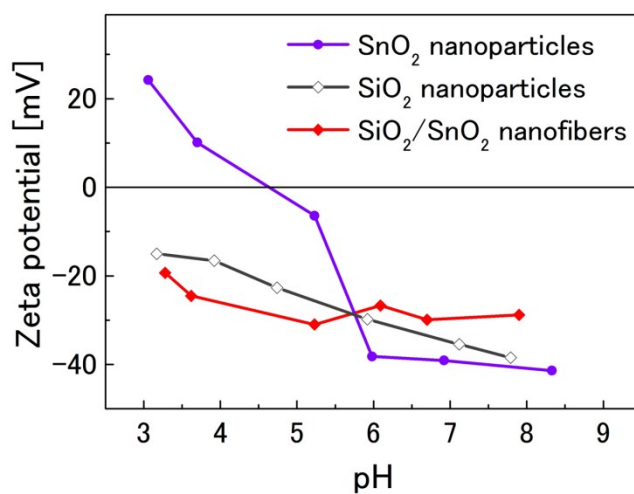

**Fig. S3** Zeta potential of SnO<sub>2</sub> nanoparticles, SiO<sub>2</sub> nanoparticles, and SiO<sub>2</sub>/SnO<sub>2</sub> nanofibers at various pH values.

## Supplemental Data 4

Electric resistance changes under introduction of air containing 200 ppm H<sub>2</sub> or CO at various temperatures between 300 and 450°C in dry condition.

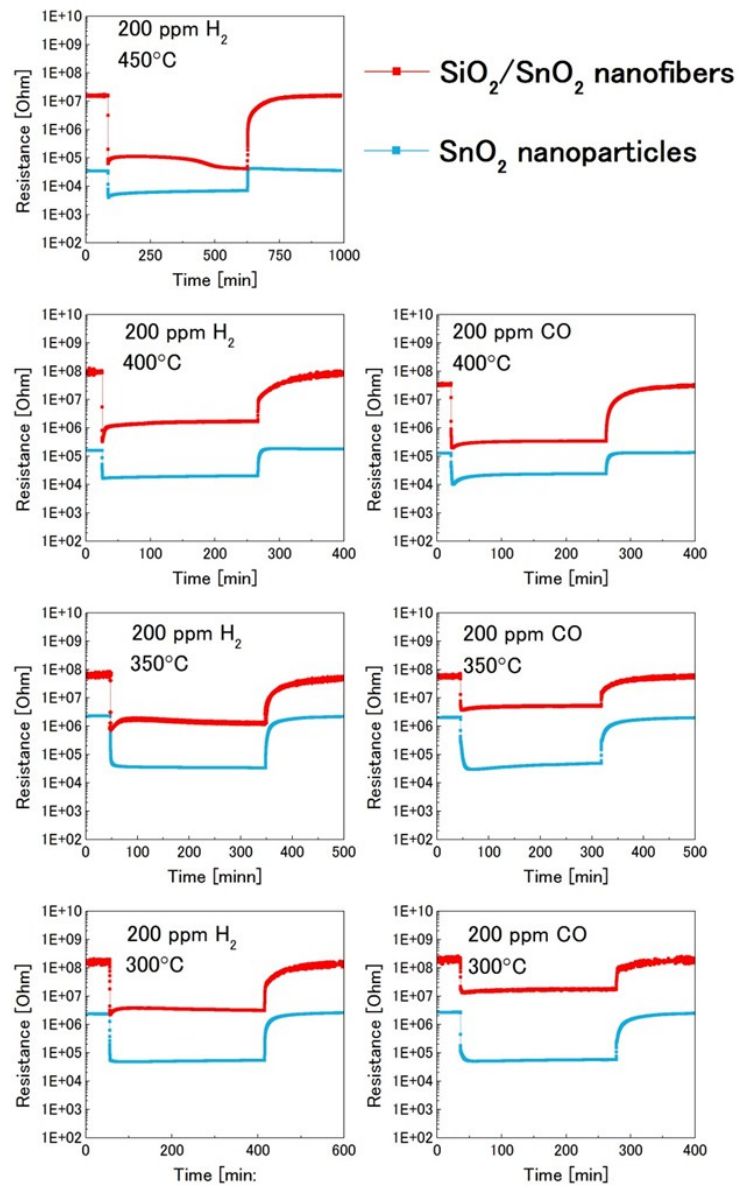

**Fig. S4** Electric resistance changes under introduction of H<sub>2</sub> or CO at various temperatures in dry condition.

## Supplemental Data 5

Electric resistance changes under introduction of air containing 200 ppm H<sub>2</sub> or CO at 400°C or 450°C in humid condition containing up to 3 vol% water vapor.

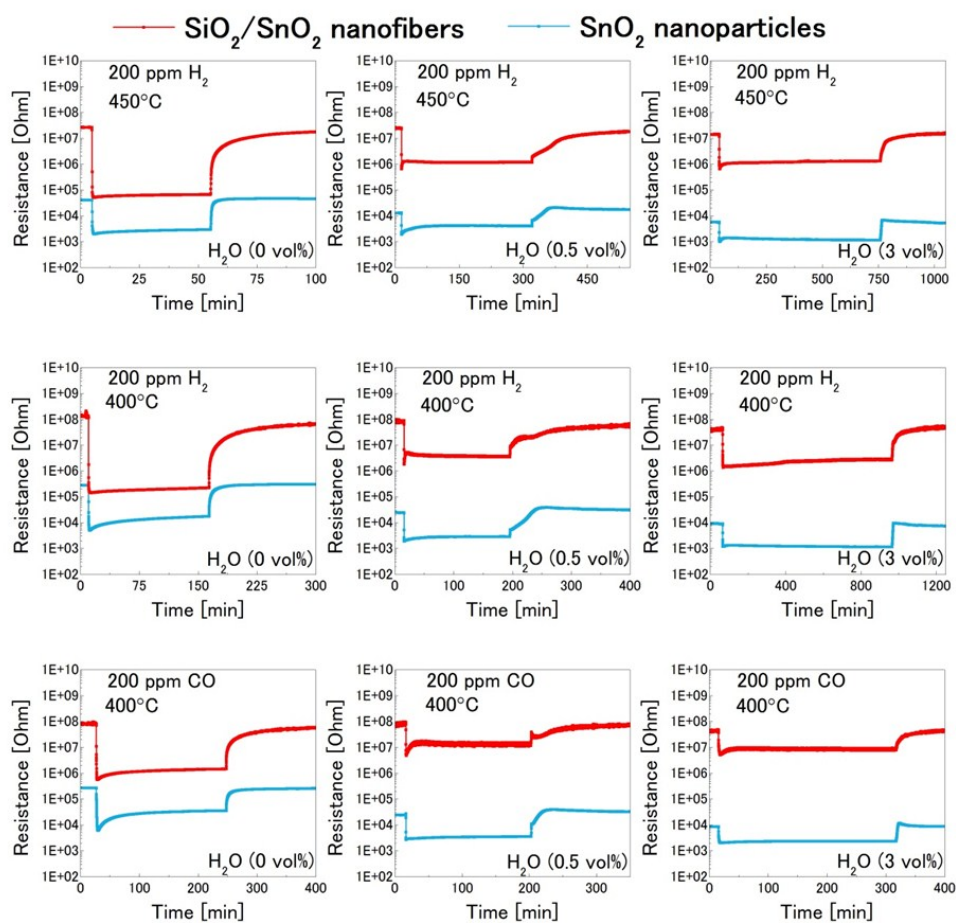

**Fig. S5** Electric resistance changes under introduction of H<sub>2</sub> or CO at various temperatures and various humidities.

## References

1. J. Wang, B. Zou and M. A. El-Sayed, *J. Mol. Struct.*, 1999, **508**, 87-96.
2. P. Shah, A. V. Ramaswamy, K. Lazar and V. Ramaswamy, *Appl. Catal. A Gen.*, 2004, **273**, 239-248.
3. D. Amalric-Poprescu and F. Bozon-Verduraz, *Catalysis Today* **70**, 139 (2001).
4. D. Barreca, S. Garon, E. Tondello, and P. Zanella, *Surface Science Spectra* 7, 81 (2000).
5. V. M. Jiménez, J. A. Mejías, J. P. Espinós, and A. R. González-Elipe, *Surface Science* 366, 545 (1996).
6. S. Gunji, Y. Shimotsuma and K. Miura, *J. Sol-Gel Sci. Technol.*, 2016, **79**, 151-159.
